# Supplementary material
Source: publisher site journal article supplement (https://www.dovepress.com/article/222925)
Supplement: Supplementary file 1 [file get_supplementary_file.php]

**Occurrence and Characteristics of Hospitalizations During First-Line Chemotherapy Among Individuals with Metastatic Colorectal Cancer**

***Supplementary information***

Appendix Table 1: Index regimens and associated patient counts

| **First-Line Chemotherapy Regimen** | **N** | **%** |
| --- | --- | --- |
| BEV&5-FU&LEU&OXA | 211 | 29.4% |
| 5-FU&LEU&OXA | 159 | 22.2% |
| BEV&5-FU&IRI&LEU | 79 | 11.0% |
| CAP | 36 | 5.0% |
| BEV&CAP&OXA | 34 | 4.7% |
| CAP&OXA | 31 | 4.3% |
| 5-FU&IRI&LEU | 22 | 3.1% |
| BEV&CAP | 17 | 2.4% |
| BEV&5-FU&LEU | 17 | 2.4% |
| BEV&5-FU&IRI&LEU&OXA | 12 | 1.7% |
| 5-FU | 12 | 1.7% |
| 5-FU&LEU | 12 | 1.7% |
| BEV | 11 | 1.5% |
| BEV&5-FU&IRI | 11 | 1.5% |
| BEV&5-FU&OXA | 9 | 1.3% |
| BEV&CAP&IRI | 8 | 1.1% |
| 5-FU&IRI&LEU&OXA | 7 | 1.0% |
| 5-FU&OXA | 6 | 0.8% |
| CAP&IRI | 3 | 0.4% |
| OXA | 3 | 0.4% |
| BEV&5-FU | 2 | 0.3% |
| BEV&IRI&OXA | 2 | 0.3% |
| 5-FU&IRI | 2 | 0.3% |
| IRI | 2 | 0.3% |
| BEV&CAP&5-FU&IRI&LEU | 1 | 0.1% |
| BEV&CAP&5-FU&LEU | 1 | 0.1% |
| BEV&CAP&5-FU&LEU&OXA | 1 | 0.1% |
| BEV&IRI | 1 | 0.1% |
| BEV&IRI&LEU&OXA | 1 | 0.1% |
| BEV&OXA | 1 | 0.1% |
| CAP&5-FU&IRI&LEU | 1 | 0.1% |
| CAP&5-FU&LEU&OXA | 1 | 0.1% |
| IRI&OXA | 1 | 0.1% |
| **TOTAL** | **717** | **100.0%** |

5-FU, 5-fluorouracil; BEV, bevacizumab; CAP, capecitabine; IRI, irinotecan; OXA, oxaliplatin.

Regimens are also distinguished based on the inclusion of levoleucovorin (LEU).
